# Supplementary material
Source: publisher figshare collection journal article supplement (https://gsapubs.figshare.com/ndownloader/files/34594580)
Supplement: Supplementary file 1 [file 34594580]

## Sheet: Table
TABLE S5. COMPARISON OF CONCORDIA AND WEIGHTED MEAN AGE DATA
		Concordia					Weighted mean
Map #	Sample	Age	Error	MSWD	Prob	n*	Age	Error	MSWD	Prob	Lab†
Bass River Block
B1	18TM-001A	945	12	1.16	0.26	4	948	32	2.3	0.071	3
B2	18TM-001B	979	17	0.91	0.34	3	974	20	0.41	0.67	3
B3	15TM-296	1037	13	0.55	0.46	6	1028	26	0.32	0.9	3
B4	E11-W13-212	604.4	8.2	17	0	5	601.3	4.6	0.82	0.51	1
B5	12TM-666	609.2	3.8	0.081	0.78	5	609	10	3.6	0.006	1
B6	E11-W13-210B	605.5	4.3	4.1	0.044	5	604.6	8.3	1.18	0.12	1
B7	E11-W13-210B	603.6	3.6	4.2	0.04	8	602.2	3.5	0.64	0.73	1
B8	12TM-777	612.5	4.7	13	0	5	610.7	5.9	2.3	0.057	1
B9	E11-W13-188B	612.6	3.6	0.86	0.35	3	611.1	4.6	0.65	0.52	1
B10	15CEW-015A	606.5	3.3	4.5	0.034	19	605.8	3.3	0.9	0.57	3
Jeffers Block - Western
JW1	14TM-191	617	1.8	0.71	0.4	23	616.6	2.1	1.17	0.27	2
JW2	14TM-622	607.7	2.8	1.07	0.3	6	607.2	4.5	1.4	0.21	2
JW3	14TM-070	594.7	3.6	0.77	0.38	5	593.9	9.4	3.2	0.031	2
JW4	14TM-177	593.4	4.3	2	0.15	3	592	12	1.5	0.22	2
JW5	14TM-045	602.3	1.9	4.1	0.0452	26	601.6	1.9	0.96	0.5	2
JW6	14TM-264B	602.1	2.5	0.61	0.44	11	601.7	2.6	0.99	0.45	2
JW7	14TM-040	601.2	3.6	0.021	0.88	10	600.4	4	0.87	0.55	1
JW8	14TM-106	595.6	3.6	0.028	0.6	6	595.2	7.6	1.7	0.12	1
JW9	14TM-147	593.4	2.7	3.4	0.066	12	591.8	3.2	0.95	0.5	1
JW10	14TM-855	596.7	2.4	2.9	0.88	8	596	4.9	2.7	0.009	1
Jeffers Block - Central
JC1	13TM-409	626.9	2.4	1	0.32	22	626.4	3.3	3.1	0	2
JC2	13TM-372A	628.7	2.3	0.66	0.42	17	628.3	3	1.3	0.16	2
JC3	GL15-4-16	625.1	3	4.3	0.038	16	624.1	3.7	2.3	0.003	2
JC4	13TM-328A	715.5	3.4	0.47	0.49	5	715.2	6.5	1.8	0.13	2
JC5	13TM-351	629.5	8.6	9.8	0.002	4	6.28.6	9.7	1.7	0.16	2
JC6	13TM-325	626	1.8	0.32	0.57	17	626.3	2.4	1.4	0.12	2
Jeffers Block - Eastern
JE1	11TM-036A	592.2	2.1	1.4	0.23	32	591.5	2.6	2.1	0	2
JE2	19CW-079C	621.37	0.56	0.0063	0.98	6	621.4	1.1	0.017	1	4
Mount Ephraim Block
M1	08TM-068A	982	16	0.57	0.45	3	982	45	6.6	0.001	1
M2	08TM-068B	1198	16	1.04	0.31	4	1210	64	2.9	0.034	3
M3	08TM-016	1250.8	9.9	0.0071	0.93	3	1228	91	4.7	0.009	1
M4	19CW-057	752.9	2.4	1.04	0.31	10	751.7	2.9	0.43	0.92	2
M5	19CW-059	733	2.2	1.2	0.27	21	733.8	3.1	1.5	0.064	2
M6	08TM-007	727.4	4.3	0.53	0.47	27	726.6	4.6	0.3	1	3
M7	08TM-007A	752.7	8.7	0.53	0.47	5	750.1	4.2	0.14	0.97	2
M8	08TM-105A	733.6	7.3	0.0003	0.99	5	734	8	2.6	0.036	1
M9	19CW-020	754.5	5.4	7.8	0.005	7	752.5	6.8	2.3	0.034	2
M10	08TM-021	739	2.9	3.4	0.066	55	738.3	3	0.98	0.57	3
M11	08TM-021A	750.4	3.4	0.44	0.84	7	750	3.5	0.78	0.59	1
M12	08TM-041A	736.9	6.2	0.019	0.89	6	737.9	9.5	1.5	0.18	1
M13	E11-W12-191	631.9	3.3	0.018	0.89	15	632.1	4.7	3.2	0	2
M14	19CW-035	631.2	2.6	0.2	0.26	9	630.4	2.8	0.77	0.63	2
n* Number of analyses used in concordia and weighted mean age calculations.
Lab† 1=UNB, polished thin section (see Supplemental Material Table S1); 2=UNB, polished grain
mount (see Supplemental Material Table S2); 3=Boise, polished grain mount
(see Supplemental Material Table S3); 4=Boise, TIMS (see Supplemental Material Table S4).
Analyst for UNB work was T. G. MacHattie, except samples M4, M5,and M14 analyzed by D. van Rooyen.
Analyst for Boise work was J.L. Crowley.
Concordia and weighted mean data prepared by C.E. White.

## Sheet: Info
This Supplemental Material accompanies
White, C.E., Barr, S.M., Crowley, J.L., van Rooyen, D., and MacHattie, T.G., 2022, U-Pb zircon ages and
Sm-Nd isotopic data from the Cobequid Highlands, Nova Scotia, Canada: New contributions to understanding
the Neoproterozoic geologic history of Avalonia, in Kuiper, Y.D., Murphy, J.B., Nance, R.D., Strachan, R.A.,
and Thompson, M.D., eds., New Developments in the Appalachian-Caledonian-Variscan Orogen: Geological
Society of America Special Paper 554, https://doi.org/10.1130/2021.2554(07).
